# Supplementary material for: Gene Expression-Genotype Analysis Implicates GSDMA, GSDMB, and LRRC3C as Contributors to Inflammatory Bowel Disease Susceptibility
Source: PubMed Central journal article supplement (PMC4592899; doi:10.1155/2015/834805), 2015-09-21
Supplement: 834805.f1.pdf [file 834805.f1.pdf]

**S1 Table. Gene expression assays.**

|                            | <b>Gene</b>   | <b>Assay ID<sup>a</sup></b> |
|----------------------------|---------------|-----------------------------|
| <b>Reference genes</b>     | <i>CASC3</i>  | Hs00201226_m1               |
|                            | <i>POP4</i>   | Hs00198357_m1               |
|                            | <i>UBA52</i>  | Hs03004332_g1               |
| <b>IBD candidate genes</b> | <i>CSF3</i>   | Hs00357085_g1               |
|                            | <i>ERBB2</i>  | Hs01001580_m1               |
|                            | <i>GRB7</i>   | Hs00918009_g1               |
|                            | <i>GSDMA</i>  | Hs00937853_m1               |
|                            | <i>GSDMB</i>  | Hs00218565_m1               |
|                            | <i>IKZF3</i>  | Hs00232635_m1               |
|                            | <i>LRRC3C</i> | custom-made assay           |
|                            | <i>MED24</i>  | Hs00207863_m1               |
|                            | <i>MIEN1</i>  | Hs00260553_m1               |
|                            | <i>ORMDL3</i> | Hs00918021_m1               |
|                            | <i>PGAP3</i>  | Hs00544681_m1               |
|                            | <i>PSMD3</i>  | Hs00160646_m1               |
|                            | <i>ZBP2</i>   | Hs00418432_m1               |

<sup>a</sup> Assay identification number according to Life Technologies,

Carlsbad, CA, USA. Primer and probe sequences of the custom-made assay for *LRRC3C* are available upon request.

**S2 Table. Drug-mediated effects on gene expression in colonic IBD biopsy samples.**

| <b>Genes<sup>d</sup></b> | <b>Non-inflamed IBD colon</b> |                           |                           | <b>Inflamed IBD colon</b> |                           |                           |
|--------------------------|-------------------------------|---------------------------|---------------------------|---------------------------|---------------------------|---------------------------|
|                          | TP vs. no TP <sup>a</sup>     | AS vs. no AS <sup>b</sup> | CS vs. no CS <sup>c</sup> | TP vs. no TP <sup>a</sup> | AS vs. no AS <sup>b</sup> | CS vs. no CS <sup>c</sup> |
|                          | (7 vs. 22)                    | (14 vs. 15)               | (8 vs. 21)                | (9 vs. 19)                | (15 vs. 13)               | (12 vs. 16)               |
|                          | <i>P</i> -value               | <i>P</i> -value           | <i>P</i> -value           | <i>P</i> -value           | <i>P</i> -value           | <i>P</i> -value           |
| <i>PGAP3</i>             | 0.78                          | 0.45                      | 0.40                      | 0.16                      | 0.47                      | 0.13                      |
| <i>ERBB2</i>             | 0.67                          | 0.53                      | 0.10                      | 0.29                      | 0.029                     | 0.13                      |
| <i>MIEN1</i>             | 0.33                          | 0.75                      | 0.49                      | 0.92                      | 0.62                      | 0.40                      |
| <i>GRB7</i>              | 0.90                          | 0.65                      | 0.35                      | 0.22                      | 0.27                      | 0.80                      |
| <i>IKZF3</i>             | 0.71                          | 0.026                     | 0.047                     | 0.96                      | 1.00                      | 0.28                      |
| <i>ZPBP2</i>             | 0.50                          | 0.093                     | 0.021                     | 0.89                      | 0.89                      | 0.98                      |
| <i>GSDMB</i>             | 0.20                          | 0.65                      | 0.79                      | 1.00                      | 0.052                     | 0.16                      |
| <i>ORMDL3</i>            | 0.088                         | 0.40                      | 0.40                      | 0.50                      | 0.75                      | 0.95                      |
| <i>LRRC3C</i>            | 0.26                          | 0.81                      | 0.46                      | 0.56                      | 0.72                      | 0.090                     |
| <i>GSDMA</i>             | 0.50                          | 0.81                      | 0.98                      | 0.31                      | 0.59                      | 0.10                      |
| <i>PSMD3</i>             | 0.53                          | 0.68                      | 0.76                      | 0.41                      | 0.16                      | 0.21                      |
| <i>CSF3</i>              | 0.98                          | 0.95                      | 0.40                      | 0.85                      | 0.79                      | 0.70                      |
| <i>MED24</i>             | 0.86                          | 0.38                      | 0.28                      | 1.00                      | 0.79                      | 0.13                      |

<sup>a</sup> Thiopurine (TP) treatment vs. no TP treatment.

<sup>b</sup> Aminosalicylate (AS) treatment vs. no AS treatment.

<sup>c</sup> Corticosteroid (CS) treatment vs. no CS treatment.

<sup>d</sup> Genes have been arranged (top to bottom) in the order in which they are positioned along the chromosome, and the risk locus (rs2872507) is located between *ZPBP2* and *GSDMB* (closer to *ZPBP2*).

**S3 Table. Differential gene expression in relation to colonic sampling locations.**

| <b>Genes<sup>a</sup></b> | <b>P-value<sup>b</sup></b> | <b>Fold change<sup>c</sup></b> |
|--------------------------|----------------------------|--------------------------------|
| <i>PGAP3</i>             | 0.21                       | 1.21                           |
| <i>ERBB2</i>             | $6.7 \times 10^{-03}$      | 1.36                           |
| <i>MIEN1</i>             | 0.060                      | 1.22                           |
| <i>GRB7</i>              | 0.32                       | 1.14                           |
| <i>IKZF3</i>             | 0.46                       | 1.29                           |
| <i>ZPBP2</i>             | 0.92                       | 1.30                           |
| <i>GSDMB</i>             | 0.050                      | 1.45                           |
| <i>ORMDL3</i>            | 0.27                       | 1.16                           |
| <i>LRRC3C</i>            | 0.41                       | 1.81                           |
| <i>GSDMA</i>             | 0.47                       | 1.94                           |
| <i>PSMD3</i>             | 0.11                       | 1.16                           |
| <i>CSF3</i>              | 0.56                       | 1.42                           |
| <i>MED24</i>             | 0.31                       | 1.43                           |

<sup>a</sup> Genes have been arranged (top to bottom) in the order in which they are positioned along the chromosome.

<sup>b</sup> Biopsy samples from ascending colon (n = 13), transverse colon (n = 11), descending colon (n = 10), and sigmoid colon (n = 23) from the non-inflamed intestinal mucosa of individuals without IBD. Caecum and rectum were excluded because of a low number of samples.

<sup>c</sup> Fold change for the colonic segment with highest expression compared to the colonic segment with the lowest expression.

**S4 Table. Differential gene expression in colonic vs. ileal biopsies from non-inflamed, non-IBD mucosa.**

| <b>Genes<sup>a</sup></b> | <b>P-value</b>        | <b>Fold change<sup>b</sup></b> |
|--------------------------|-----------------------|--------------------------------|
| <i>PGAP3</i>             | 0.053                 | -1.21                          |
| <i>ERBB2</i>             | 0.15                  | 1.08                           |
| <i>MIEN1</i>             | $7.1 \times 10^{-03}$ | -1.21                          |
| <i>GRB7</i>              | 0.69                  | -1.03                          |
| <i>IKZF3</i>             | $1.7 \times 10^{-04}$ | 2.23                           |
| <i>ZPBP2</i>             | 0.013                 | 2.56                           |
| <i>GSDMB</i>             | 0.16                  | 1.18                           |
| <i>ORMDL3</i>            | $1.8 \times 10^{-05}$ | 1.34                           |
| <i>LRRC3C</i>            | $2.2 \times 10^{-04}$ | -3.85                          |
| <i>GSDMA</i>             | 0.056                 | -1.31                          |
| <i>PSMD3</i>             | $6.2 \times 10^{-07}$ | -1.34                          |
| <i>CSF3</i>              | 0.97                  | 1.39                           |
| <i>MED24</i>             | 0.63                  | 1.03                           |

<sup>a</sup> Genes have been arranged (top to bottom) in the order in which they are positioned along the chromosome.

<sup>b</sup> A negative fold change indicates reduced expression in the ileum compared with that in the colon.
